# Supplementary material
Source: publisher figshare collection journal article supplement (https://acs.figshare.com/ndownloader/files/8493581)
Supplement: Supplementary file 1 [file 8493581]

# SUPPORTING INFORMATION TO: Atom Tunneling in the Hydroxylation Process of Taurine/ $\alpha$ -Ketoglutarate Dioxygenase (TauD) Identified by QM/MM Simulations

Sonia Álvarez-Barcia\* and Johannes Kästner

*Institute for Theoretical Chemistry, University of Stuttgart, Pfaffenwaldring 55, 70569  
Stuttgart, Germany.*

E-mail: alvarez@theochem.uni-stuttgart.de

Phone: +49 (0)711 685-64404. Fax: +49 (0)711 685-64442

## Computational details

### Molecular Dynamics (MD) simulations

The first step was the construction of a model of the enzyme. We started from the crystal structure of *E. coli* TauD with iron,  $\alpha$ -ketoglutarate and taurine bound to the enzyme (PDB code 1OS7, resolution of 2.50 Å).<sup>1</sup> In the PDB file, 4 monomers can be distinguished; in three of them the taurine is properly linked (i.e. they are closed conformations). We have chosen one of those closed conformations (chain B) to build our model. In order to study the hydroxylation process, we had to modify the structure of the monomer in order to get the quintet [Fe(IV)=O] pre-reactive complex: we added the oxo group to the iron and replaced the  $\alpha$ -ketoglutarate by succinate.

To properly solvate and equilibrate the enzyme, we carried out MD simulations of the reactant state prior to the QM/MM calculations. The NAMD2 code<sup>2</sup> with the CHARMM22<sup>3-8</sup> force field were used. Parameters for succinate, taurine and the [Fe(IV)=O] complex were defined by homology (see next section). We employed the REDUCE code<sup>9</sup> for adding hydrogen atoms to the enzyme. We solvated the model with a pre-equilibrated box of TIP3P water,<sup>10</sup> in each direction 10 Å wider than the enzyme. Na<sup>+</sup> and Cl<sup>-</sup> ions (0.15 mol/L) were added to ensure the overall charge neutrality of the model. Both processes were done with VMD (version 1.9.2).<sup>11</sup>

5 MD simulation runs of 4 ns each, starting from random initial velocities were performed at 300 K and 1 bar controlled by a Langevin piston N ose–Hoover thermostat. A time step of 1 fs was chosen. During the simulations, three steps can be differentiated: a) the solvation process (2000 steps of minimization followed by 50000 steps of MD) where the protein is frozen and the water molecules can spread into the protein; b) MD runs of 50000 steps where the protein atoms were restrained by harmonic potentials with force constants of 5.0, 2.0 and 0.1 kcal mol<sup>-1</sup> Å<sup>-2</sup>; c) free MD production runs (up to 4 ns). In simulation 1, a slightly different approach was used since only runs of restraints of 5.0 and 2.0 kcal mol<sup>-1</sup> Å<sup>-2</sup> were carried out before the free MD.

## QM/MM calculations

We selected 8 snapshots with the shortest (Fe)O–H distances as starting points for the QM/MM optimizations of the reactant states, because these should represent the protein environment in an configuration suitable for the reaction to proceed. We chose a total of 8 snapshots from the 5 simulations. Snapshots 1 and 8 were taken from simulation 5 (at 4.106 and 1.039 ns, respectively); snapshots 2 and 3 from simulation 2 (at 1.956 and 1.985 ns, respectively); snapshots 4 and 6 from simulation 3 (at 3.405 and 0.749 ns, respectively), snapshot 5 from simulation 1 (at 1.558 ns) and snapshot 7 from simulation 4 (at 3.914 ns). The numbering of the snapshots follows the height of the potential energy barrier, see Table 1.

The ChemShell suite was employed for performing the QM/MM calculations.<sup>12–14</sup> It uses an electrostatic embedding, in which the MM charges polarize the QM part. The MM part employed the CHARMM22<sup>3–8</sup> force field in DL\_POLY,<sup>15</sup> while the QM calculations were done with TURBOMOLE 7.0.<sup>16</sup>

### Structural/energetic study

For performing the QM/MM calculations, we selected only a part of the model used in the MD simulations. The MM part includes all protein atoms and all residues with at least one atom within a diameter of 20 Å from the Fe atom (5491–5588 atoms depending on the snapshot). Active in the geometry optimizations are all residues with at least one atom within 5 Å from Fe, succinate or taurine (which includes the water molecules that diffused into the inner part of the enzyme). The QM part consists of the truncated amino acids that are directly linked to the Fe (His<sub>99</sub>, His<sub>255</sub>, Asp<sub>101</sub>), as well as a second shell (Asn<sub>95</sub> and Arg<sub>270</sub>), succinate and taurine. In total, 81 atoms were treated quantum mechanically at the B3LYP/def2-TZVP level<sup>17–19</sup> (see Figure 3). We are considering a neutral QM system with a spin multiplicity of 5.

Initially, geometries of the snapshots selected from the MD simulations were optimized at the B3LYP/def2-SVP level<sup>17–19</sup> using the DL-FIND optimizer.<sup>20</sup> After that, scans along the distance difference  $d(\text{C-H}_\alpha) - d(\text{H}_\alpha\text{-O})$  were computed ( $\text{H}_\alpha$  being the H abstracted from taurine in the C1 position), by keeping the distance difference constant while minimizing all other degrees of freedom. We started the transition state search by the dimer method<sup>21–24</sup> from the highest energy of the scan. The final geometries were re-optimized at the B3LYP/def2-TZVP level.<sup>17–19</sup>

Minimizations starting from all transition states after small distortions along the reaction mode were carried out to confirm the structure of the reactant state and its connection to the transition state and to calculate the hydroxyl complex structure as product state.

## Energy comparison

We have performed some single point calculations with different functionals, taking as reference snapshot 1, in order to test the influence of the DFT method in the barrier (see Table S1).

Table S1: Barrier heights computed with different functionals (with the def2-TZVP basis set) for snapshot 1. The geometry obtained at the B3LYP/def2-TZVP level was used as reference geometry.

|                         | RS           | TS           | $\Delta E^\ddagger$ |
|-------------------------|--------------|--------------|---------------------|
| B3LYP                   | -3780.171516 | -3780.143314 | 17.7                |
| B3LYP (with dispersion) | -3780.342528 | -3780.317119 | 15.9                |
| BHHLYP*                 | -3780.163414 | -3780.113388 | 31.4                |
| BP86                    | -3781.854675 | -3781.822696 | 20.1                |
| M06                     | -3780.080007 | -3780.061522 | 11.6                |
| M06-2X*                 | -3780.516059 | -3780.471434 | 28.0                |
| PBE0                    | -3778.696876 | -3778.676569 | 12.7                |
| TPSS                    | -3781.809024 | -3781.771973 | 23.2                |
| TPSSh                   | -3781.521584 | -3781.486754 | 21.9                |

\* The values with BHHLYP and M06-2X were computed with NWCHEM.<sup>25</sup>

\*\* The selection of the funtionals was done following a previous publication from Chen *et al.*<sup>26</sup>

## Rate constant calculations

Theoretical reaction rate constants and kinetic isotope effects (KIEs) were computed and compared to experiments. For that purpose, Hessian calculations (two-point finite difference of gradients) of the  $\text{H}_2\text{C-Fe=O}$  fragment were carried out in DL-FIND.<sup>20</sup>

Rate constants and KIEs were calculated using transition state theory (TST) taking into account the contribution of atom tunneling by means of the Eckart barrier.<sup>27</sup> The importance of the tunneling can be easily estimated by the crossover temperature  $T_c$ ,<sup>28</sup> which is related to the curvature of the potential at the transition state:

$$T_c = \frac{\hbar \Omega}{2\pi k_B} \quad (1)$$

with  $\Omega$  being the barrier frequency (the absolute value of the imaginary frequency corre-

sponding to the transition mode) and  $k_B$  Boltzmann’s constant.

$T_c$  generally indicates the temperature at which tunneling and the thermal mechanism (reaction occurs if the barrier is overcome) have roughly equal importance.<sup>29</sup> Note that  $T_c$  is close to room temperature for reactions with  $\Omega = 1300 \text{ cm}^{-1}$ . Therefore, tunneling is expected to be important at room temperature for higher barrier frequencies.

The doubly deuterated C1-aurine species was used for the KIEs calculations.

### **Analysis of the electronic structure during H atom transfer (HAT)**

Natural spin densities were calculated by using the TURBOMOLE package<sup>16</sup> (NBO<sup>30</sup> and intrinsic bond orbitals (IBO)<sup>31</sup> approaches were employed) at the B3LYP/def2-TZVP//B3LYP/def2-SVP level for analyzing the course of the reaction. The snapshot with the lowest barrier height (snapshot 1) was chosen for this detailed study.

## **Topology and Parameter files for succinate, taurine and the [Fe(IV)=O] complex**

### **Topology File**

In our simulations, we used the CHARMM22 force field, therefore, with the purpose of setting up our system, we have modified the topology file top\_all22\_prot.inp. 3 new residues were defined in order to simulate the enzyme: the succinate (RESI SUC), the taurine (RESI TAU) and the [Fe(IV)=O] complex (RESI FEO). The patch (PRES FEOX) allows us to change the standard/original charge values for others more appropriate for the TauD enzyme. The charge values for the FEOX patch and the taurine were calculated at the B3LYP/def2-SVP level with the IBOS approach, during the setup of the system, using a QM/MM model similar to the ones employed in the final study.

|      |          |          |
|------|----------|----------|
| PRES | FE0X     | -1.68    |
| ATOM | 1FE FE   | 1.44     |
| ATOM | 10FE OM  | -0.55    |
| ATOM | 201 OC   | -0.59    |
| ATOM | 202 OC   | -0.61    |
| ATOM | 3NE2 NR2 | -0.35    |
| ATOM | 4NE2 NR4 | -0.35    |
| ATOM | 5OD1 OC  | -0.67    |
| BOND | 1FE 202  | 1FE 3NE2 |
| BOND | 1FE 5OD1 |          |
| BOND | 1FE 4NE2 | 1FE 201  |

|      |     |      |
|------|-----|------|
| RESI | FEO | 0.89 |
|------|-----|------|

GROUP

|      |        |       |
|------|--------|-------|
| ATOM | FE FE  | 1.44  |
| ATOM | OFE OM | -0.55 |
| BOND | FE OFE |       |

|      |     |       |
|------|-----|-------|
| RESI | SUC | -1.68 |
|------|-----|-------|

GROUP

|      |        |       |
|------|--------|-------|
| ATOM | C4 CT2 | -0.28 |
| ATOM | HG1 HA | 0.09  |
| ATOM | HG2 HA | 0.09  |
| ATOM | C5 CC  | 0.62  |
| ATOM | O4 OC  | -0.76 |
| ATOM | O3 OC  | -0.76 |

GROUP

|          |     |     |       |     |
|----------|-----|-----|-------|-----|
| ATOM     | C3  | CT2 | -0.28 |     |
| ATOM     | HG3 | HA  | 0.09  |     |
| ATOM     | HG4 | HA  | 0.09  |     |
| ATOM     | C2  | CC  | 0.62  |     |
| ATOM     | O1  | OC  | -0.59 |     |
| ATOM     | O2  | OC  | -0.61 |     |
| BOND     | C4  | HG1 | C4    | HG2 |
| BOND     | C5  | C4  | C5    | O3  |
|          |     |     | C5    | O4  |
| BOND     | C3  | C4  | C3    | HG3 |
|          |     |     | C3    | HG4 |
| BOND     | C2  | C3  | C2    | O1  |
|          |     |     | C2    | O2  |
| IMPR     | C2  | C3  | O2    | O1  |
| IMPR     | C5  | C4  | O3    | O4  |
| ACCEPTOR | O1  |     | C1    |     |
| ACCEPTOR | O2  |     | C1    |     |
| ACCEPTOR | O3  |     | C5    |     |
| ACCEPTOR | O4  |     | C5    |     |

|      |     |      |
|------|-----|------|
| RESI | TAU | 0.00 |
|------|-----|------|

GROUP

|      |     |     |       |
|------|-----|-----|-------|
| ATOM | O1  | 0   | -0.95 |
| ATOM | O2  | 0   | -0.98 |
| ATOM | O3  | 0   | -0.93 |
| ATOM | S   | S0  | 2.13  |
| ATOM | C2  | CT2 | -0.46 |
| ATOM | HG1 | HA  | 0.16  |
| ATOM | HG2 | HA  | 0.16  |

GROUP

ATOM C1 CT2 -0.13

ATOM HE1 HA 0.16

ATOM HE2 HA 0.15

ATOM N1 NH3 -0.34

ATOM HZ1 HC 0.31

ATOM HZ2 HC 0.35

ATOM HZ3 HC 0.37

BOND N1 HZ1 N1 HZ2 N1 HZ3

BOND C1 N1 C1 HE1 C1 HE2

BOND C2 C1 C2 HG1 C2 HG2

BOND C2 S S 01 S 02 S 03

DONOR HZ1 NZ

DONOR HZ2 NZ

DONOR HZ3 NZ

ACCEPTOR 01 S

ACCEPTOR 02 S

ACCEPTOR 03 S

IC S C2 \*C1 HE1 1.4604 110.4600 119.9100 110.5100 1.1128

IC S C2 \*C1 HE2 1.4604 110.4600 -120.0200 110.5700 1.1123



## Parameter File

In our simulations, we used the CHARMM22 force field, therefore we have added new parameters to the parameter file par\_all22\_prot.inp in order to fully describe our system. Several parameters for the taurine, the succinate and the Fe=O center were added during the setup of the system (we also modified three of the original ones, marked with an asterisk). Some of them come from analogous values found them in the original file and other were obtained from QM/MM calculations done during the setup process.

### BONDS

|     |      |         |          |
|-----|------|---------|----------|
| NR2 | FE   | 65.000  | 2.1000 * |
| NR4 | CPH1 | 400.000 | 1.3800   |
| NR4 | CPH2 | 400.000 | 1.3200   |
| NR4 | FE   | 65.000  | 2.1000   |
| OM  | FE   | 250.000 | 1.6100 * |
| S0  | O    | 205.000 | 1.5010   |
| S0  | CT2  | 198.000 | 1.8180   |
| C   | CC   | 600.000 | 1.5700   |
| FE  | OC   | 250.000 | 2.0000   |

### ANGLES

|     |     |     |         |        |
|-----|-----|-----|---------|--------|
| O   | S0  | O   | 100.000 | 112.00 |
| CT2 | S0  | O   | 100.000 | 105.45 |
| HA  | CT2 | S0  | 46.100  | 106.70 |
| CT2 | CT2 | S0  | 55.000  | 110.94 |
| CC  | C   | CT2 | 52.000  | 113.90 |
| C   | CC  | OC  | 40.000  | 118.50 |

|      |      |      |         |          |       |         |
|------|------|------|---------|----------|-------|---------|
| CC   | C    | O    | 80.000  | 119.47   |       |         |
| NR2  | FE   | OM   | 50.000  | 180.00   |       |         |
| NR2  | FE   | OC   | 100.000 | 90.93    |       |         |
| OC   | FE   | OM   | 100.000 | 93.68    |       |         |
| NR2  | FE   | NR4  | 50.000  | 90.00    |       |         |
| CC   | OC   | FE   | 20.000  | 135.00   |       |         |
| OC   | FE   | OC   | 100.000 | 120.00   |       |         |
| CPH2 | NR4  | CPH1 | 130.000 | 104.0000 |       |         |
| FE   | NR4  | CPH1 | 30.000  | 133.0000 |       |         |
| FE   | NR4  | CPH2 | 30.000  | 123.0000 |       |         |
| NR4  | CPH1 | CPH1 | 130.000 | 110.0000 |       |         |
| NR4  | CPH1 | CT2  | 45.800  | 120.0000 |       |         |
| NR4  | CPH1 | HR3  | 25.000  | 120.00   | 20.00 | 2.14000 |
| NR4  | CPH2 | HR1  | 25.000  | 125.00   | 20.00 | 2.12000 |
| NR4  | CPH2 | NR1  | 130.000 | 112.5000 |       |         |
| NR4  | FE   | CM   | 50.000  | 180.0000 |       |         |
| NR4  | FE   | NPH  | 50.000  | 90.0000  |       |         |
| NR4  | FE   | OM   | 50.000  | 90.000   |       |         |
| NR4  | FE   | OC   | 100.000 | 120.000  |       |         |

#### DIHEDRALS

|      |      |     |     |        |   |        |
|------|------|-----|-----|--------|---|--------|
| O    | S0   | CT2 | CT2 | 0.2700 | 3 | 0.00   |
| O    | S0   | CT2 | HA  | 0.2000 | 3 | 0.00   |
| NR1  | CPH2 | NR2 | FE  | 0.2000 | 2 | 180.00 |
| CPH1 | CPH1 | NR2 | FE  | 0.2000 | 2 | 180.00 |
| HR1  | CPH2 | NR2 | FE  | 0.2000 | 2 | 180.00 |

|      |      |      |      |         |   |        |
|------|------|------|------|---------|---|--------|
| NR2  | FE   | OC   | CC   | 5.2000  | 2 | 0.00   |
| HR3  | CPH1 | NR2  | FE   | 0.2000  | 2 | 180.00 |
| CT2  | CC   | OC   | FE   | 0.2000  | 2 | 180.00 |
| CC   | OC   | FE   | OC   | 5.2000  | 2 | 180.00 |
| CC   | OC   | FE   | OM   | 5.2000  | 2 | 0.00   |
| OC   | CC   | OC   | FE   | 5.2000  | 2 | 180.00 |
| CPH2 | NR4  | CPH1 | CPH1 | 14.0000 | 2 | 180.00 |
| CT2  | CPH1 | NR4  | CPH2 | 3.0000  | 2 | 180.00 |
| HR1  | CPH2 | NR4  | CPH1 | 3.0000  | 2 | 180.00 |
| HR3  | CPH1 | NR4  | CPH2 | 3.0000  | 2 | 180.00 |
| NR1  | CPH2 | NR4  | CPH1 | 14.0000 | 2 | 180.00 |
| NR4  | CPH1 | CPH1 | CT2  | 3.0000  | 2 | 180.00 |
| NR4  | CPH1 | CPH1 | CT3  | 3.0000  | 2 | 180.00 |
| NR4  | CPH1 | CPH1 | HR3  | 3.0000  | 2 | 180.00 |
| NR4  | CPH1 | CPH1 | NR1  | 14.0000 | 2 | 180.00 |
| NR4  | CPH1 | CT2  | CT1  | 0.1900  | 3 | 0.00   |
| NR4  | CPH1 | CT2  | CT2  | 0.1900  | 3 | 0.00   |
| NR4  | CPH1 | CT2  | CT3  | 0.1900  | 3 | 0.00   |
| NR4  | CPH1 | CT2  | HA   | 0.1900  | 3 | 0.00   |
| NR4  | CPH1 | CT3  | HA   | 0.1900  | 3 | 0.00   |
| NR4  | CPH2 | NR1  | CPH1 | 14.0000 | 2 | 180.00 |
| NR4  | CPH2 | NR1  | H    | 1.0000  | 2 | 180.00 |
| X    | FE   | NR4  | X    | 0.0500  | 4 | 0.00   |
| NR1  | CPH2 | NR4  | FE   | 0.2000  | 2 | 180.00 |
| CPH1 | CPH1 | NR4  | FE   | 0.2000  | 2 | 180.00 |
| HR1  | CPH2 | NR4  | FE   | 0.2000  | 2 | 180.00 |
| NR4  | FE   | OC   | CC   | 5.2000  | 2 | 180.00 |

|     |      |     |    |        |   |        |
|-----|------|-----|----|--------|---|--------|
| HR3 | CPH1 | NR4 | FE | 0.2000 | 2 | 180.00 |
|-----|------|-----|----|--------|---|--------|

# IMPROPER

|     |      |      |      |         |   |        |
|-----|------|------|------|---------|---|--------|
| C   | CC   | O    | CT2  | 96.0000 | 0 | 0.0000 |
| HR1 | NR1  | NR4  | CPH2 | 0.5000  | 0 | 0.0000 |
| HR1 | NR4  | NR1  | CPH2 | 0.5000  | 0 | 0.0000 |
| HR3 | CPH1 | NR4  | CPH1 | 0.5000  | 0 | 0.0000 |
| HR3 | NR4  | CPH1 | CPH1 | 0.5000  | 0 | 0.0000 |

# NONBONDED

|     |          |           |            |
|-----|----------|-----------|------------|
| COO | 0.000000 | -0.070000 | 2.000000   |
| NR4 | 0.000000 | -0.200000 | 1.850000   |
| SO  | 0.000000 | -0.450000 | 2.000000   |
| FE  | 0.000000 | -0.250000 | 1.090000 * |

## Results

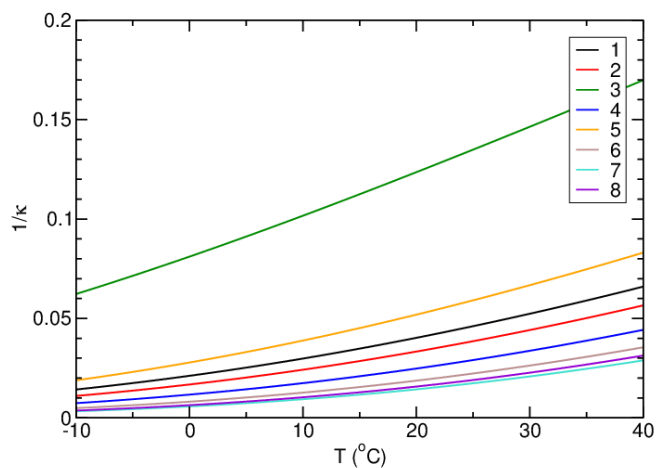

Figure S1: Inverse of  $\kappa$  as a function of  $T$  (in K) for the 8 snapshots, being  $\kappa = k_{\text{Eckart}}/k_{\text{classical}}$ ; i.e.  $\kappa$  represents the increase of the rate constants due to the effect of the tunneling.

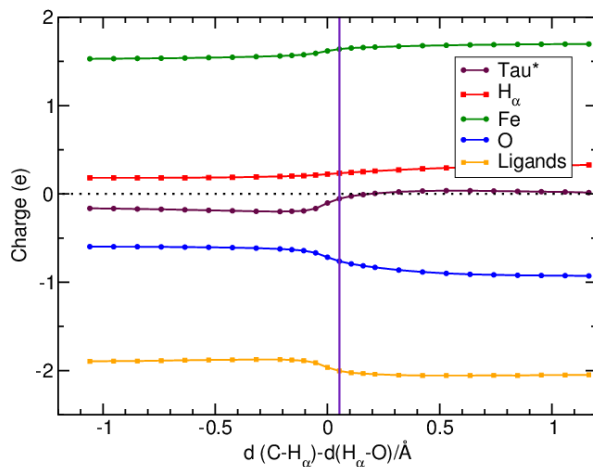

Figure S2: IBO charges along the H-abstraction reaction path for snapshot 1. The distance difference  $d(\text{C-H}_\alpha) - d(\text{H}_\alpha\text{-O})$  has been used as reaction coordinate (being  $\text{H}_\alpha$  the abstracted H from the taurine). The reaction coordinate was computed at the B3LYP/def2-TZVP//B3LYP/def2-SVP level. The vertical violet line shows the position of the TS during the scan.

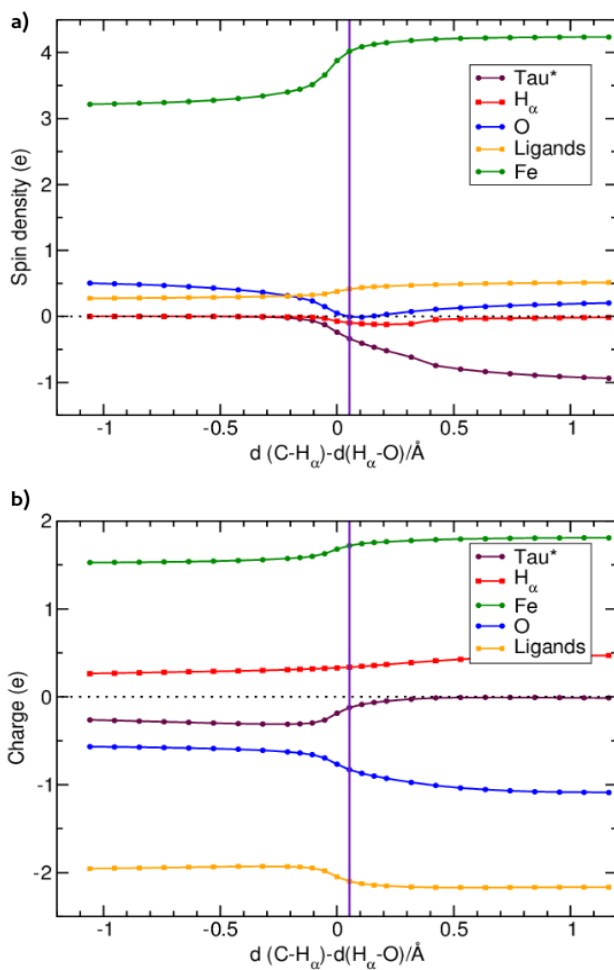

Figure S3: a) NBO spin densities and b) NBO charges along the H-abstraction reaction path for snapshot 1. The distance difference  $d(\text{C-H}_\alpha) - d(\text{H}_\alpha\text{-O})$  has been used as reaction coordinate (being  $\text{H}_\alpha$  the abstracted H from the taurine). The reaction coordinate was computed at the B3LYP/def2-TZVP//B3LYP/def2-SVP level. The vertical violet line shows the position of the TS during the scan.

## Complete list of authors (manuscript)

**Reference 22:** Baugh L.; Phan I.; Begley D.W.; Matthew C.; Clifton M.C.; Armour B.; Dranow D.M.; Taylor B.M.; Muruthi M.M.; Abendroth J.; Fairman J.W.; Fox III D.; Dieterich S.H.; Staker B.L.; Gardberg A.S.; Choi R.; Hewitt S.N.; Napuli A.J.; Myers J.; Barrett L.K.; Zhang Y.; Ferrell M.; Mundt E.; Thompkins K.; Tran N.; Lyons-Abbott S.; Abramov A.; Sekar A.; Serbzhinskiy D.; Lorimer D.; Buchko G.W.; Stacy R.; Stewart L.J.; Edwards T.E.; Van Voorhis W.C.; and Myler P.J., *Tuberculosis* **2015**, *95*, 142-148.

**Reference 39:** Sherwood P.; de Vries A.H.; Guest M.F.; Schreckenbach G.; Catlow C.R.A.; French S.A.; Sokol A.A.; Bromley S.T.; Thiel W.; Turner A.J.; Billeter S.; Terstegen F.; Thiel S.; Kendrick J.; Rogers S.C.; Casci J.; Watson M.; King F.; Karlsen E.; Sjøvoll M.; Fahmi A.; Schafer A.; Lennartz C., *Comp. Theor. Chem.* **2003**, *632*, 1-28.

## References

- (1) O'Brien, J. R.; Schuller, D. J.; Yang, V. S.; Dillard, B. D.; Lanzilotta, W. N. *Biochemistry* **2003**, *42*, 5547–5554.
- (2) Phillips, J. C.; Braun, R.; Wang, W.; Gumbart, J.; Tajkhorshid, E.; Villa, E.; Chipot, C.; Skeel, R. D.; Kalé, L.; Schulten, K. *J. Comput. Chem.* **2005**, *26*, 1781–1802.
- (3) MacKerell, A. D.; Bashford, D.; Bellott, M.; Dunbrack, R. L.; Evanseck, J. D.; Field, M. J.; Fischer, S.; Gao, J.; Guo, H.; Ha, S. *J. Phys. Chem. B* **1998**, *102*, 3586–3616.
- (4) MacKerell, A. D.; Banavali, N. K. *J. Comput. Chem.* **2000**, *21*, 105–120.
- (5) Mackerell, A. D.; Feig, M.; Brooks, C. L. *J. Comput. Chem.* **2004**, *25*, 1400–1415.
- (6) Feller, S. E.; MacKerell, A. D. *J. Phys. Chem. B* **2000**, *104*, 7510–7515.
- (7) Feller, S. E.; Gawrisch, K.; MacKerell, A. D. *J. Am. Chem. Soc.* **2002**, *124*, 318–326.
- (8) Foloppe, N.; MacKerell, A. D. *J. Comput. Chem.* **2000**, *21*, 86–104.
- (9) Word, J. M.; Lovell, S. C.; Richardson, J. S.; Richardson, D. C. *J. Mol. Biol.* **1999**, *285*, 1735–1747.
- (10) Jorgensen, W. L.; Chandrasekhar, J.; Madura, J. D.; Impey, R. W.; Klein, M. L. *J. Chem. Phys.* **1983**, *79*, 926–935.
- (11) Humphrey, W.; Dalke, A.; Schulten, K. *J. Mol. Graphics* **1996**, *14*, 27–28.
- (12) Sherwood, P.; de Vries, A.; Guest, M.; Schreckenbach, G.; Catlow, C.; French, S.; Sokol, A.; Bromley, S.; Thiel, W.; Turner, A.; et al., *Comp. Theor. Chem.* **2003**, *632*, 1–28.



- (13) Metz, S.; Kästner, J.; Sokol, A. A.; Keal, T. W.; Sherwood, P. *WIREs Comput. Mol. Sci.* **2014**, *4*, 101.
- (14) ChemShell, a Computational Chemistry Shell. see <http://www.chemshell.org>, accessed May 8, 2017.
- (15) Smith, W.; Yong, C.; Rodger, P. *Mol. Simul.* **2002**, *28*, 385–471.
- (16) TURBOMOLE V7.0 2015, a development of University of Karlsruhe and Forschungszentrum Karlsruhe GmbH, 1989-2007, TURBOMOLE GmbH, since 2007; available from <http://www.turbomole.com>. accessed May 8, 2017.
- (17) Becke, A. D. *J. Chem. Phys.* **1993**, *98*, 5648–5652.
- (18) Weigend, F.; Ahlrichs, R. *Phys. Chem. Chem. Phys.* **2005**, *7*, 3297–3305.
- (19) Weigend, F. *Phys. Chem. Chem. Phys.* **2006**, *8*, 1057–1065.
- (20) Kästner, J.; Carr, J. M.; Keal, T. W.; Thiel, W.; Wander, A.; Sherwood, P. *J. Phys. Chem. A* **2009**, *113*, 11856–11865.
- (21) Henkelman, G.; Jónsson, H. *J. Chem. Phys.* **1999**, *111*, 7010.
- (22) Olsen, R. A.; Kroes, G. J.; Henkelman, G.; Arnaldsson, A.; Jónsson, H. *J. Chem. Phys.* **2004**, *121*, 9776.
- (23) Heyden, A.; Bell, A. T.; Keil, F. J. *J. Chem. Phys.* **2005**, *123*, 224101.
- (24) Kästner, J.; Sherwood, P. *J. Chem. Phys.* **2008**, *128*, 014106.
- (25) Valiev, M.; Bylaska, E.; Govind, N.; Kowalski, K.; Straatsma, T.; Dam, H. V.; Wang, D.; Nieplocha, J.; Apra, E.; Windus, T.; de Jong, W. *Comp. Phys. Comm.* **2010**, *181*, 1477 – 1489.

- (26) Chen, H.; Lai, W.; Shaik, S. *The Journal of Physical Chemistry Letters* **2010**, *1*, 1533–1540.
- (27) Eckart, C. *Phys. Rev.* **1930**, *35*, 1303–1309.
- (28) Gillan, M. J. *J. Phys. C: Solid State Physics* **1987**, *20*, 3621–3641.
- (29) Kästner, J. *WIREs Comput. Mol. Sci.* **2014**, *4*, 158.
- (30) Reed, A. E.; Weinstock, R. B.; Weinhold, F. *J. Chem. Phys.* **1985**, *83*, 735–746.
- (31) Knizia, G. *J. Chem. Theory. Comput.* **2013**, *9*, 4834–4843.
